# Supplementary material
Source: publisher figshare collection journal article supplement (https://sage.figshare.com/ndownloader/files/17398532)
Supplement: Supplementary file 1 [file 17398532]

|   | Items                                                                                                                             | Possible responses (score)                                                                                   |
|---|-----------------------------------------------------------------------------------------------------------------------------------|--------------------------------------------------------------------------------------------------------------|
| A | Has food intake declined over the past 3 months due to loss of appetite, digestive problems, chewing, or swallowing difficulties? | 0 = severe decrease in food intake<br>1 = moderate decrease in food intake<br>2 = no decrease in food intake |
| B | Weight loss during the last 3 months?                                                                                             | 0 = weight loss >3 kg<br>1 = does not know<br>2 = weight loss between 1 and 3 kg<br>3 = no weight loss       |
| C | Mobility?                                                                                                                         | 0 = bed or chair bound<br>1 = able to get out of bed/ chair but does not go out<br>2 = goes out              |
| E | Neuropsychological problems?                                                                                                      | 0 = severe dementia or depression<br>1 = mild dementia<br>2 = no psychological problems                      |
| F | BMI? (weight in kg)/(height in m <sup>2</sup> )                                                                                   | 0 = BMI <19<br>1 = BMI 19 to <21<br>2 = BMI 21 to <23<br>3 = BMI ≥23                                         |
| H | Takes more than three prescription drugs per day?                                                                                 | 0 = yes<br>1 = no                                                                                            |
| P | In comparison with other people of the same age, how does the patient consider his/her health status?                             | 0.0 = not as good<br>0.5 = does not know<br>1.0 = as good<br>2.0 = better                                    |
|   | Age                                                                                                                               | 0: >85<br>1: 80–85<br>2: <80                                                                                 |
|   | Total score                                                                                                                       | 0–17                                                                                                         |
